# Supplementary material for: A selective and sensitive phthalimide-based fluorescent probe for hydrogen sulfide with a large Stokes shift
Source: Royal Society of Chemistry journal article supplement (doi:10.1039/c5ra19081a), 2015-01-01
Supplement: c5ra19081a1.pdf [file c5ra19081a1.pdf]

## Supporting Information

### A selective and sensitive phthalimide-based fluorescent probe for hydrogen sulfide with a large Stokes shift

Liu Yang,<sup>‡<sup>a</sup></sup> Xingjiang Liu,<sup>‡<sup>a</sup></sup> Li Gao,<sup>a</sup> Fengpei Qi,<sup>a</sup> Huihui Tian<sup>a</sup> and Xiangzhi Song<sup>ab\*</sup>

<sup>a</sup> College of Chemistry & Chemical Engineering, Central South University, Changsha, Hunan Province, P. R. China, 410083.

<sup>b</sup> State Key Laboratory of Fine Chemicals, Dalian University of Technology, Dalian, Liaoning Province, P. R. China, 116024.

\* Corresponding author. Fax: +86-731-88836954; Tel: +86-731-88836954; Email: xzsong@csu.edu.cn (XZ Song).

<sup>‡</sup> These authors contribute equal to this work.

### Contents

|                                       |   |
|---------------------------------------|---|
| Fig. S1 .....                         | 2 |
| Fig. S2 .....                         | 2 |
| Fig. S3 .....                         | 3 |
| Fig. S4 .....                         | 3 |
| Fig. S5 .....                         | 4 |
| Fig. S6 .....                         | 4 |
| Fig. S7 .....                         | 5 |
| Fig. S8 .....                         | 5 |
| Fig. S9 .....                         | 6 |
| Fig. S10 .....                        | 6 |
| Fig. S11 .....                        | 7 |
| Fig. S12 .....                        | 7 |
| pH effects on the ESIPT process ..... | 7 |
| Fig. S13 .....                        | 8 |
| Fig. S14 .....                        | 8 |

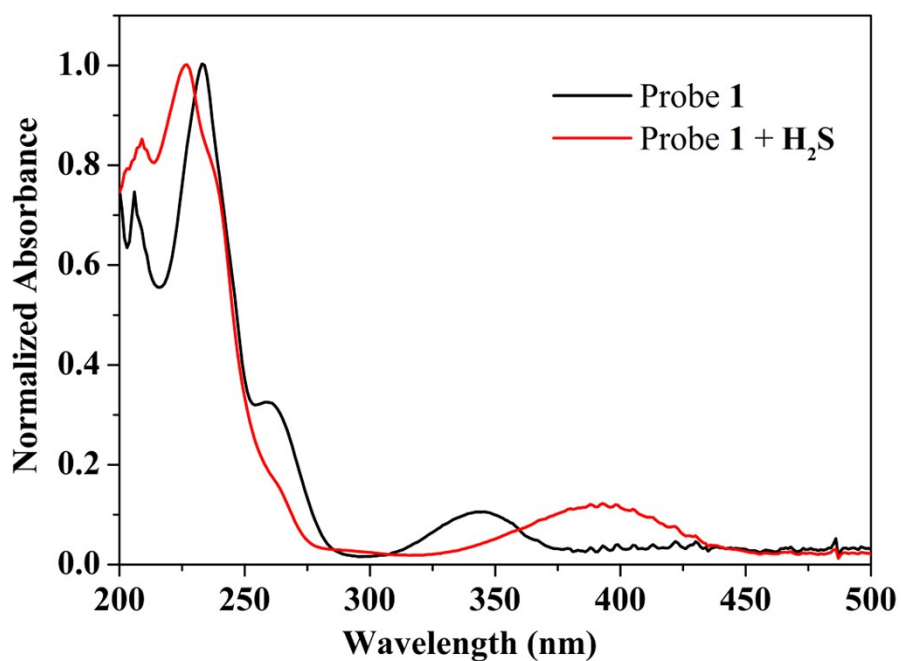

**Fig. S1** Normalized absorption spectra of Probe 1 (10.0  $\mu$ M) in the absence/presence of H<sub>2</sub>S (12.0 equiv.) in PBS buffer (10.0 mM, pH = 7.4, containing 1.0 mM CTAB).

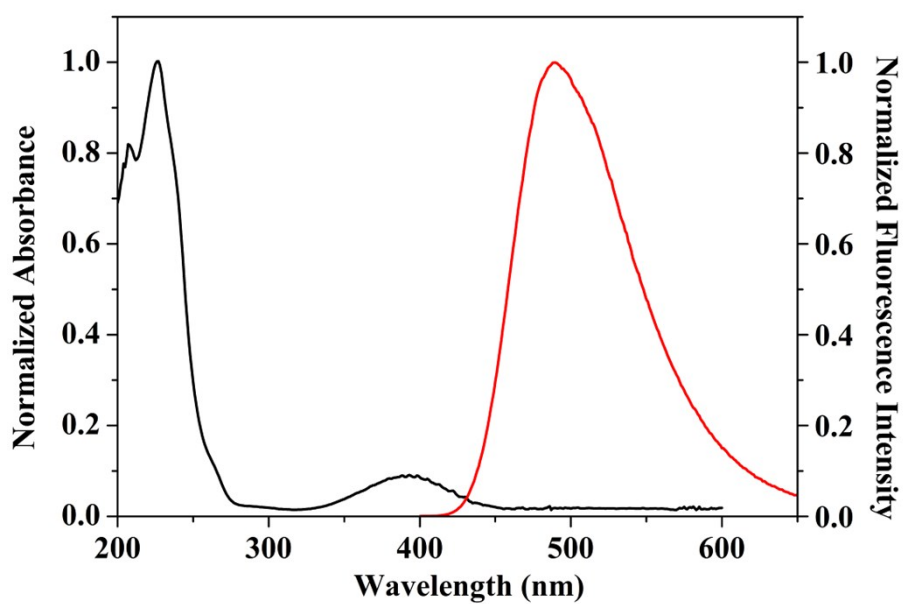

**Fig. S2** Normalized absorption (black line) and fluorescence (red line) spectra of dye 3 in PBS buffer (10.0 mM, pH = 7.4, containing 1.0 mM CTAB).

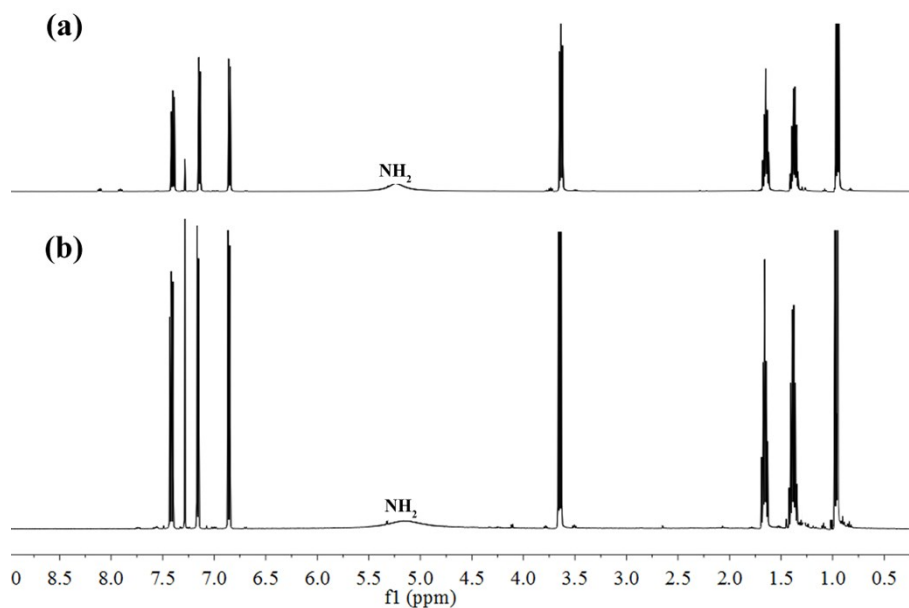

**Fig. S3**  $^1\text{H}$  NMR spectra of reaction product of Probe **1** with  $\text{H}_2\text{S}$  (a) and reference dye **3** (b) in  $\text{CDCl}_3$ .

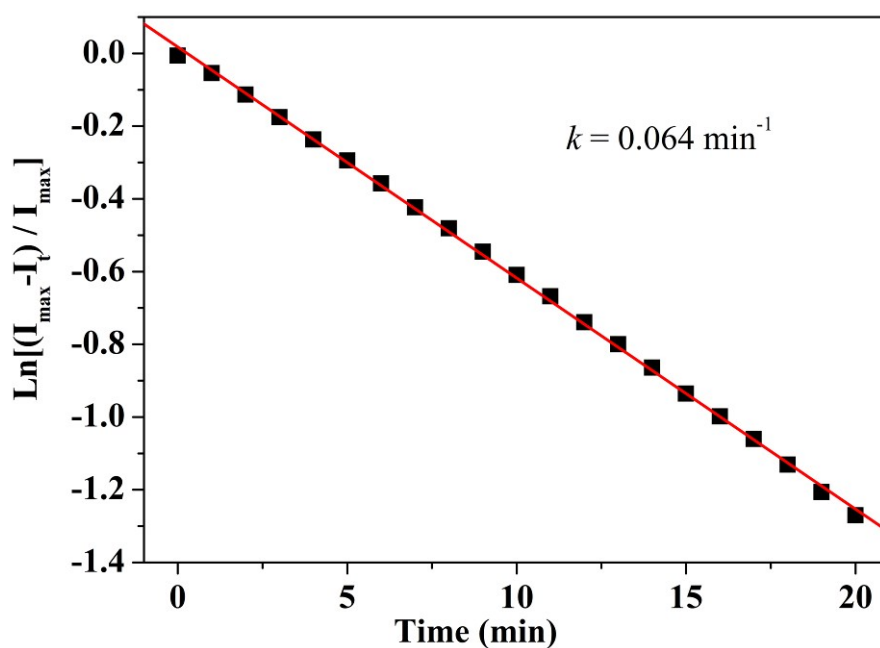

**Fig. S4** *Pseudo*-first-order kinetic plot of Probe **1** with  $\text{H}_2\text{S}$  (12.0 equiv.) in PBS buffer (10.0 mM, pH = 7.4, containing 1.0 mM CTAB). Where  $I_t$  and  $I_{\text{max}}$  are the fluorescence intensities at 492 nm at time  $t$  and the maximum value obtained after the reaction is complete, respectively, and  $k$  is the *pseudo*-first-order rate constant.

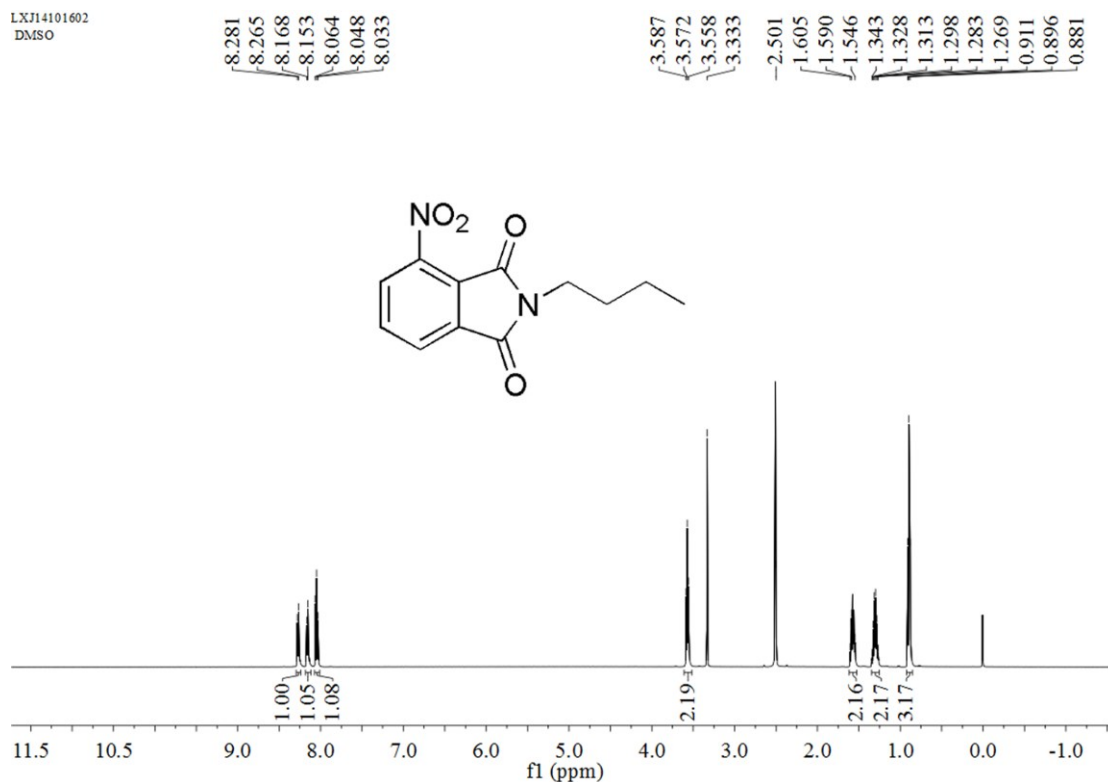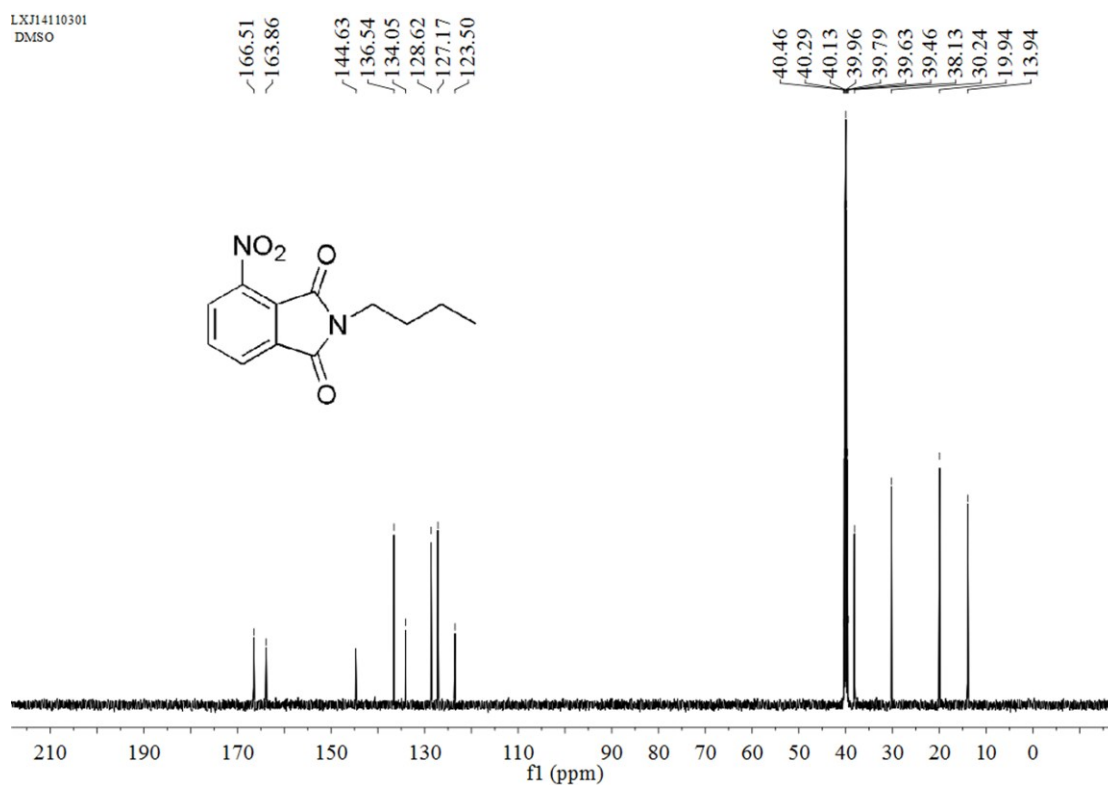

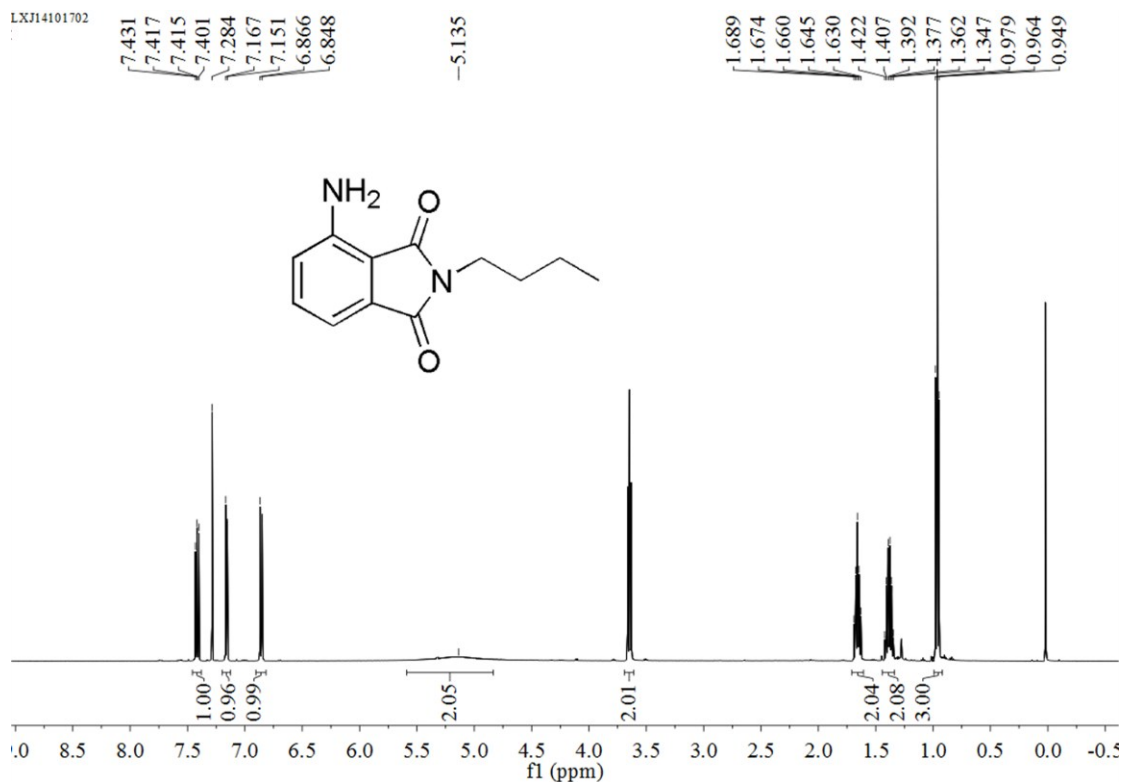

Fig. S7  $^1\text{H}$  NMR spectrum of compound 3 in  $\text{CDCl}_3$ .

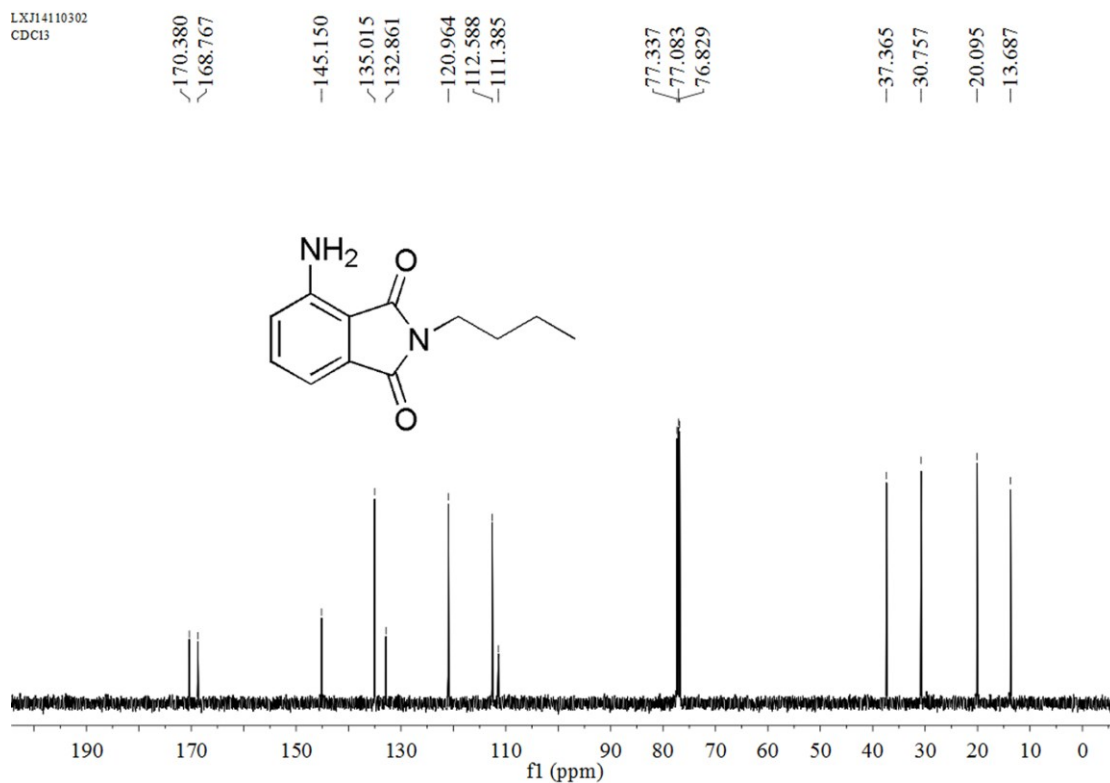

Fig. S8  $^{13}\text{C}$  NMR spectrum of compound 3 in  $\text{CDCl}_3$ .

2014-11-25-N3

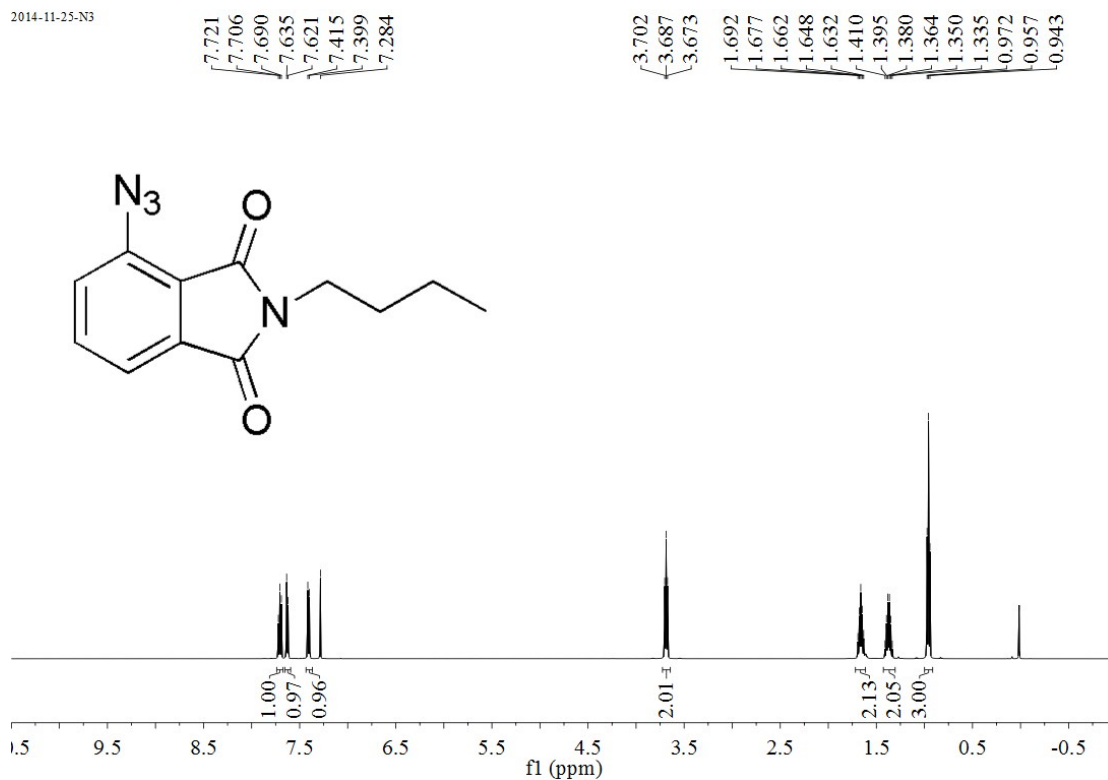**Fig. S9** <sup>1</sup>H NMR spectrum of Probe 1 in CDCl<sub>3</sub>.

2014-11-25-N3

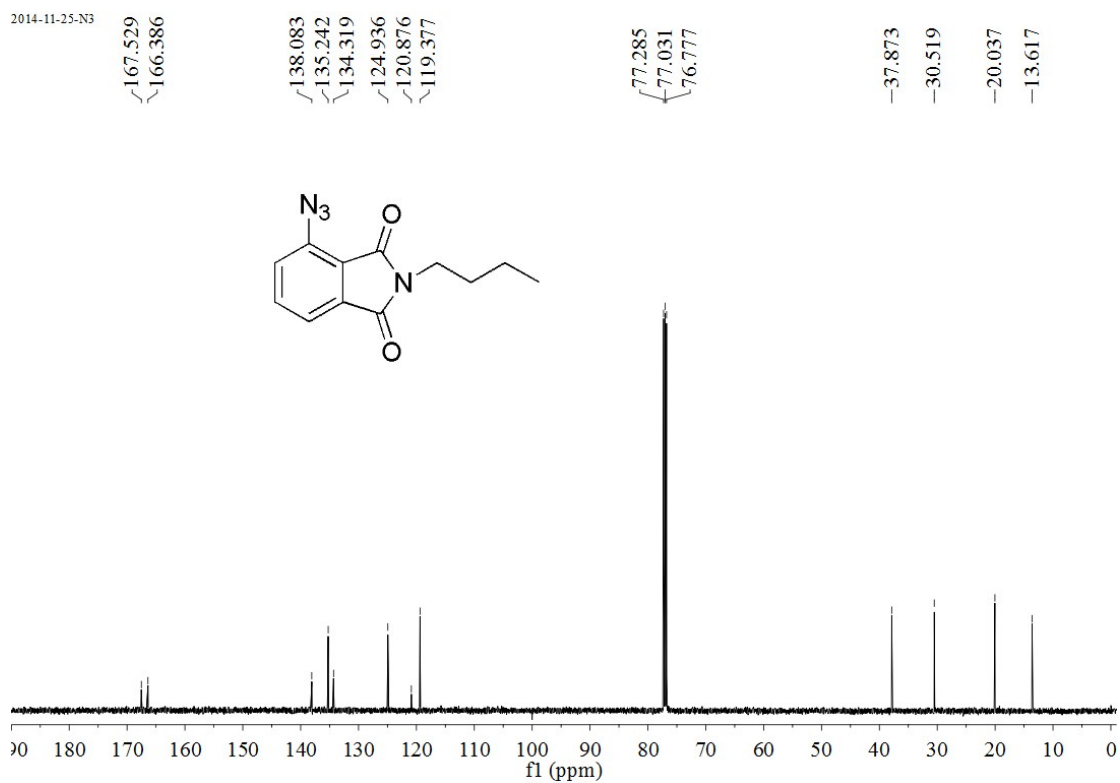**Fig. S10** <sup>13</sup>C NMR spectrum of Probe 1 in CDCl<sub>3</sub>.

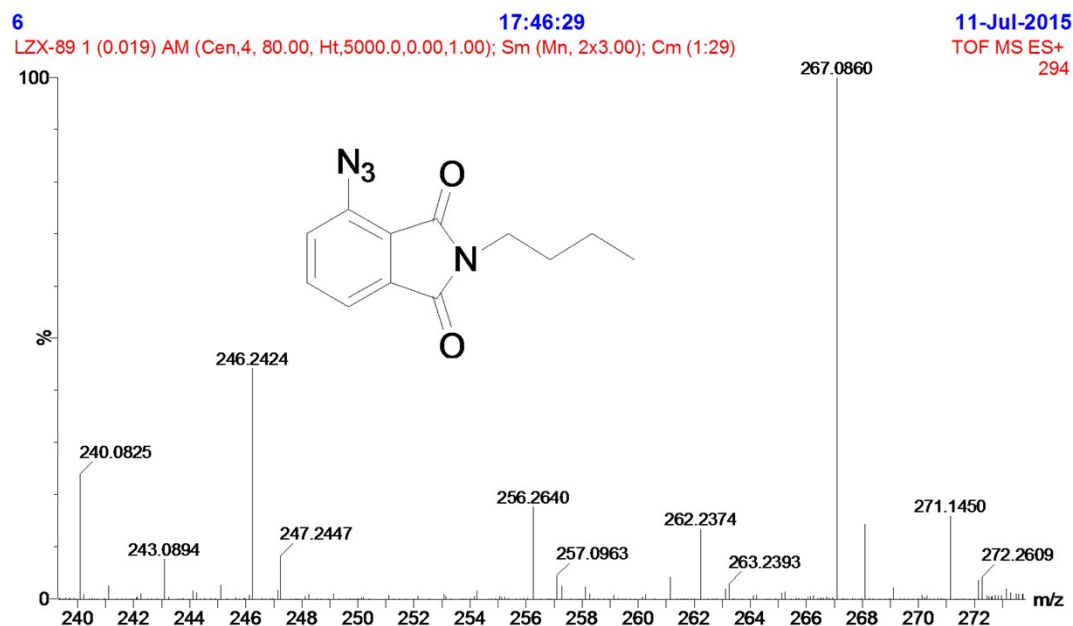

Fig. S11 HRMS spectrum of Probe 1.

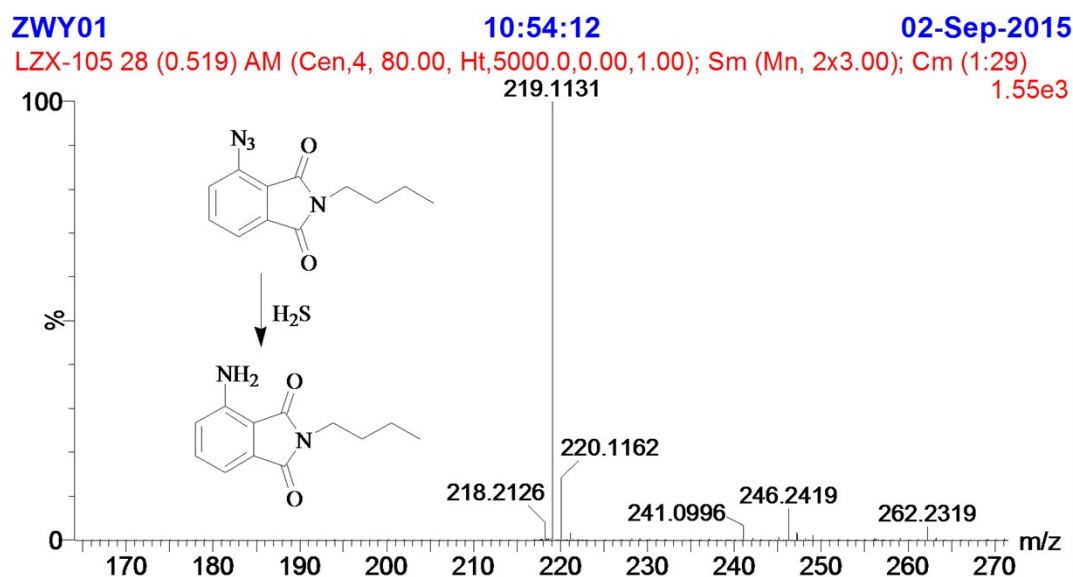

Fig. S12 HRMS spectrum of the reaction product of Probe 1 with  $H_2S$ .

### pH effects on the ESIPT process

We investigated the fluorescence property of free compound **3** at a pH range from 2.0 to 4.0. As shown in Fig. S13, strong fluorescence was observed which indicated that the ESIPT process in compound **3** could still occur in strong acid media. In this article, we have demonstrated that the reaction product of Probe 1 with  $H_2S$ , supposed to be 3-aminophthalimide, displayed ESIPT property between pH 5.0-12.0. We also investigated the pH-dependent fluorescence of 3-aminophthalimide, compound **3**, at the pH range of 5.0-12.0. As shown in Fig. R14, there is no pH effect

on the fluorescence behavior of 3-aminophthalimide, further confirming that pH 5.0-12.0 cannot interfere the ESIPT process. Because the protons on nitrogen in 3-aminophthalimide, the main proton donor, is hardly dissociated even in strong basic media (pKa for anilines is about 17-28), the occurrence of the ESIPT process can exist at 5.0-12.0. In addition, the protons of H<sub>2</sub>O from aqueous media can assist intramolecular proton transfer (J. Phys. Chem. B 2013, 117, 2160-2168; ChemPhyChem, 2014, 15, 1793-1798). Therefore, the ESIPT process in 3-aminophthalimide was not affected at pH 5.0-12.0.

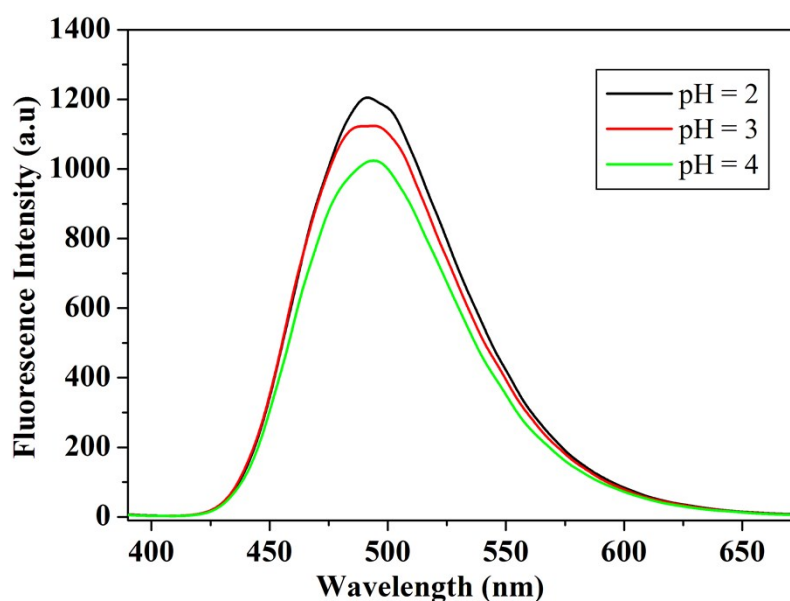

**Fig. S13** Fluorescence spectra of free compound **3** in a pH range from 2.0 to 4.0.

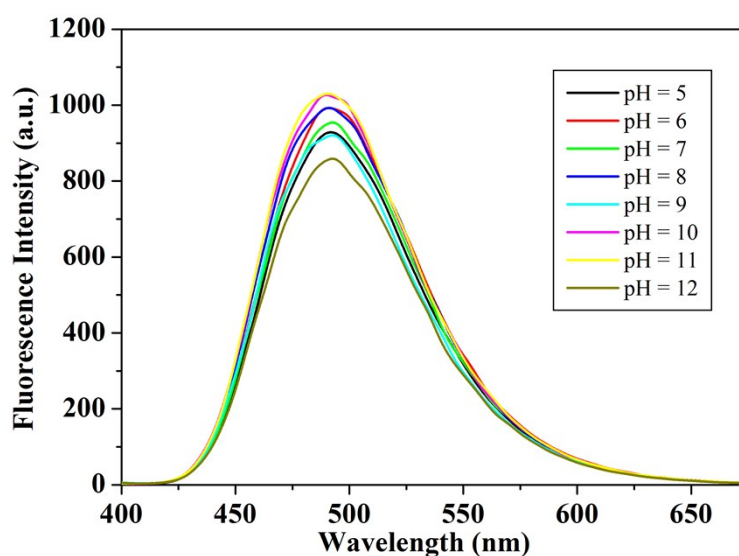

**Fig. S14** Fluorescence spectra of free compound **3** in a pH range from 5.0 to 12.0.



### Sensing mechanism

We studied the fluorescence response of Probe **1** toward H<sub>2</sub>S in pH range from 2.0 to 4.0. It's found that negligible fluorescence was observed between pH 2.0 to 3.0, and weak fluorescence signal was obtained at pH 4.0. It suggested that H<sub>2</sub>S could not reduce N<sub>3</sub> group to NH<sub>2</sub> in strong acid solution. The proposed sensing mechanism of Probe **1** for H<sub>2</sub>S was shown in scheme S1. In the acid media, H<sub>2</sub>S mainly existed in the form of H<sub>2</sub>S rather than HS<sup>-</sup>, resulting in the failure of reduction.

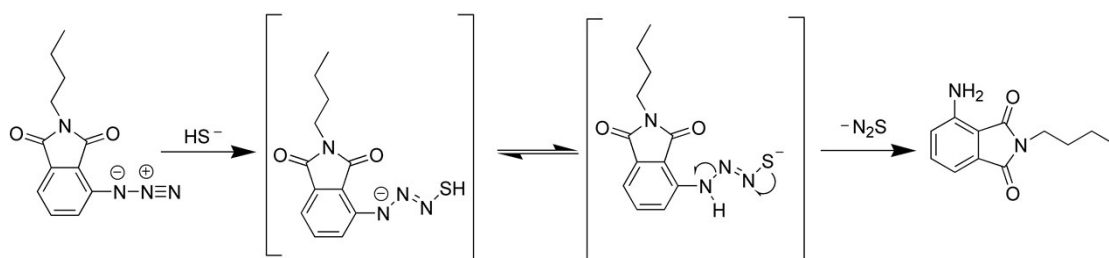

**Scheme S1** The proposed sensing mechanism of Probe **1** for H<sub>2</sub>S.
